# Supplementary material for: Project M: investigating the effect of additives on calcium carbonate crystallisation through a school citizen science program
Source: Royal Society of Chemistry journal article supplement (doi:10.1039/d3ce01173a), 2024-01-01
Supplement: d3ce01173a2.pdf [file d3ce01173a2.pdf]

## Project M Scientist Co-Authors

A list of the Project M Scientists are named below, followed by a list of schools that contributed to Project M. This list only includes those individuals who shared their consent for their name to be included, as checked directly with the team at their school. We also acknowledge those Project M Scientists who are not named here.

### Project M Scientists

Niamh Duthie

Benjamin Edwards

Susan Heywood

Joseph Maj

Sarah McGuckin

Matthew Simmers

Emma Smith

Matthew Young

Mairi Pedrog

Reuben Beers

Darius Beattie

Daniel Sterling

Joshua Tweedie

Jamie Anthony

Jacob McElnay

Isaak Johnston

Ben Bauer

Tim Devlin

John Gildea

Elvis Lo

John Harrison

Rory Dennis

Michael Sullivan

Caleb McElnay

Jing Di Ong

Caomhan Rodgers

Henry Wilson

Steven Preston

Ruben Nields

Matthew Kane

Eliakim Makoda

Charles Auchmuty

Keir Metcalfe

Adam Catherall

Christian Smaditch

Eve Webley

Tom Stone

James McCall

George Bacon

Hannah Mihsein

Eniola Awodiya

Zach Gauhar

Gill Harland

Isabella Allan

Jacob Allman

Emma Daly

William Dunlop

Hope Evans

Edward Frankpitt

James Gough

Benedict Harvey

Patrick Kelly

Georgia Ling

Mark Malone

Charles Mayall

Tegan Murphy

Elizabeth Pittman

Adam Seaward

James Stephenson

Robert Stoyale

Isobel Stylianides

Harry Tremlett

Thomas Wright

Simon Smale

Aiden Ali

Stanley Anton

Matthew Burke

Robert Caesar

Dao Man (Birdie)Cheng

Eleanor Davies

Oliver Ferris

Oscar Keene

Varvara Konyaeva

Finbar McConnell

Francis (Harry) Piggott

Boris Pustoshinskiy

Georgia Rattigan

Daria (Dasha) Romanyuk

Alisa Sedova

Elisabeth Trachtmann

Man Yin (Ian) Wan

Eward Winstanley

Wa Kun (Nathan) Wong

Daniel Townley

James Copeland-Jordan

Joanne Smith

Simon Anthony Arthur

Neha Krishna

Annabel Sun Yee Lee

Will David Carron

Sam Michael Thorogood Martin

Catherine Rebecca Whittle

Bonny Gao

Eve Myers

Terri Lewis

Claire Holyoak

Joseph Agbara

Enya Barber

Guy Batt

Sophie Bowman

Zoe Cotton

Sophia Crothall

Connor Curran

Etienne Ferenc

Evie Flynn

Oliver Gent

Lucy Griffiths

Holly Hizzey

Amy Holness

Molly Hutchinson

Sophie Jay

Eleanor Kerr

Micky Maguire

Saskia Monteiro

Attalia Mottley

Emily Mozzarelli

Fran Parr

Malachy Pearce-Scallan

Ethan Price

Daisy Ricci

Ben Saunders

Millie Shaw

George Shiell

Jemma Taggart

Annabel Turner

Katherine White

Imogen Williams

Amber Akpo

Savana Ali

Sidra Ansari

Jordan Beat

Livvie Beattie

Brooke Bennett

Victoria Browell

Hannah Bulman

Hannah Condie

Emma Dixon

Jasmine Down

Amelia Foo

Rachel Forrest

Anudi Galagedara

Laura Hagon

Sarah Haq

Phoebe Jameson

Catriona McVey

Isobel Miller

Mueerah Naeem

Eleanor Pearson

Megan Pettersson

Kiara Pillay

Emily Plummer

Rebecca Roskilly

Khadija Shah

Lydia Swales

Georgia Tribe

Sarah Vineberg

Sue Zhang

Kay Gray

David Raymond

Marguerite Wiggins

Dafni Manthiou

Eugene Wong

Finlay Stewart

Amaury Salomon

Genie Wu

John Leung

Oliver Yuan

Gabriel Bellamy Place

Alisa Ivanenko

Austen Wall

Ivan Busha

Russell Woodger

Gabriela Biesiadecka

Sarina Allan

Aimee Bennett

Nadine Eble

Daisy Finch

Maggie Gao

Rachel Gargan

Ruth Hardy

Kate Lim

Charlotte Mitri

Isis Tong

Jenny Wong

Louise Racster

Hana Abouzeid

Ali Sumayya

Furkan Ashgar

Matthew Bennett

Hannah Buckley

Lucas Casey

Phoebe Dickson

Molly Ditchfield

Jack Gartside

Olivia Green

Douglas Haigh

Mohammed (Ibrahim) Hussain

Eisha Ishaque

William Lamb

Ishika Lamba

Isabel (Izzy) McAndrew

Prinesh Mistry

Luke Paslowski

Saad Qasim

Choudhury Rahman

Abdul Raja

Anna Russell

Lucy Shepherd

Teddison (Teddy) Webster

Deborah Maders

Helen North

Pollyanna Allsop

Charlie Christie

Aerin Dumenil

Samuel Jackson

Karra Laing

Iona Lauder

Adam McDonald

Max McKenzie

Dale McTavish

Nicholas Paganopoulos

Connor Purdon

Aidan Reid

Euan Reid

Nathan Scholes

Jenna Smith

Emily Stuart

Jamie Watt

Leithen Vallance

Aimee Jackson

Lauren Cross

Miah Allan

Rebecca D Brown

Alix Buchan

Adam J Crighton

Jordan L C Croll

Ellie Dalgarno



Daniel E De Freitas

Lee S Duncan

Megan Dunford

Jamie W F Elrick

Finlay Grant

Ella J Gray

Samantha Krukele

Iain D Lovie

Anna H McSwayde

Jack A Norrie

Melinda Stephen

Matthew Wheeler

Louise W Simpson

Helen Ritchie

Leah Mukubvu

Greg Zielinski

Ted Fitzgerald-Smith

Olivia Pickard

Sam Lailey

Rachel Dodd

Tara Jones

Aiswarya Pillai

Izzy Shaw

Mollie Herrington

Karim Ramminger

Dima Sherstnev

Gareth Richardson

Josch Bedford

Matthew Ayres

Emeka Albert

Tia Lam

Tayla Walker

Tyler Mason

Jack Felton

Samina Lal

Kay Brown

Anna Scott

Tanvi Sengupta

Gabriella Henson

Holly Seacombe

Joeseeph Finch

Emily Boxford

Charlotte Veale

Katie Thibaut

Anthony Anderson

Geenuka Bandaranayake

Luano Simoes

Hiba Farhan

Julie McCarthy

Wahiy Abdalla

Aoife Campbell

David Cane

Julia Cies'Lak

Giacomo Ferrante

Angus Henry

Tatiana Rosu

Alexander Solanki

Ellen Solberg-Williams

Juliette Soubra

Anna Vamos

Julia Waszak

Jabed Rahman

Emy Dalby

Mario Montes

Joanna Haywood

James Fox

Harley Holland

Kate Edwards

Sara Ali

Isobel Brock

Sahar Shams

Heather West

Mei Soun Wong

Nada Ammar

Eve Biddlecombe

Lucy Bunce

Owen Calaway

Amal Hassan

Milan Jacob

Ewan Falcon

Millie Searing

Leila Muhamudu

Alfred Asa

Cian Byatt

Ben Coldwell

George Cole

Liam Draycott

Aaron Eckley

Christopher Essl

Martha Griffiths

Scarlett Hunter

Daniel King

Luke Lambird

Joel Mensah

Grace O'Donoghue

James Payton

Sophie Roberts

Ethan Starling

Samuel Thorpe

Jasmine Turnell

Antonia Wilmot

L Dale

A Chapman

Michael Blore

Leah Casto

Steph Childs

Zoe Conroy

Adam Corsan

Grace Devine

Zoe Hill

Ross Hooley

Madeleine Hudson

Mackenzie Jackson

Jessica Johnson

Noah Kitton

Korbyn Lea-Bokelund

Hannah Lenton

Emily Lively

Kai McGlynn

Beatrice Meade

Ellika Merrill

Amy Page

Lily Payton

Millie Pedley

Emily Plant

Charlotte Pottinger

Jack Price

Daniella Rocuzzi

Mia Ross

Luke Shearman

Alfie Stevens

Clarisse Stubbs

Jonah Vos

Lily-Blu Whitehurst

Lily Worrall

Longshaw

Katie Jacobson

Risa Romy

Anna Webb

Lottie Small

Saffy Fryer

Louise Clayton

Holleigh Breslin

Sophie Bennett

Bee Forder

Daniel Lappin

Laura Harrold

Ellie Ninham

Deyana Kostova

Magdalene Debiec

Ben Dugri

Ollie Davy-Bowker

Katie Platt

Madeleine Webster-Harris

Angus Elliman

Alastair Campbell

Sam Curry

Anna Johnson

Rebecca Miller

William Walsh

Aimee Pack

Sophie Wallis

Emilia Price

William Forshaw

Stephen Workman

Isaac White

Tom Chaldecott

Rob Thomson

Kerry Lewis

Luke Doherty

Tollen Bell

Marjana Ahmed

Maame Antobre

Sulekha Farah

Zannat Kibria

Jane Hartley

Christoforos Pambou

Eleanor Langshaw

Robert Parker

Matt Johnston

Rob Potts

Charlie Lambert

Iain Campbell

Alison Wilson

Sam Gall

Michael Campbell

Meg Stewart

Rose Nicol

James Fergusson

Kobe Phung

Faraz Farooq

Amogh Bodas

Keelan Henderson

Cameron Kew

Lucy Scyner

Anjali Jayanty

Lauren Young

Lewis Falconer

Al-Amin Badmus

Asha Mullen

Nicola Crowe

Abigail Odetayo

Morgan Taylor

Amy Neish

Findlay Haddow

Henrietta Beagley

Thomas Bowie

Harry Brooks

Ellie Foster-Weir

Hannah Glover

Callum Harrington

Kieran Hart

Joel Hill-Harding

Patrick Jump

Alex Moore

Joshua Nott

Edward Phillips

Tegan Spear

Aiden Stacey

Ollie Sutton

Aaron Vella

Jorgie Wasley

Oliver Windsor

Mark Rivers

Emma Dolphin

Olivia Holmes

Nicholas Gillard

Angus Gould

Oakem Kyne

Leanna Sinclair

Nina Perry

Polly Armond

Katherine Skingle

Lewis Glover

Harry Jordan

Annabelle Seymour

Lydia Roe

Hugo Neeley

Sarah Murphy

Rosemary Coates

James Field

Toby Folkes

Dominic Bowers

Tyler Holborough

Dylan Puri

Rahkul Sathiapal

Liam Smith



Adrian Folkes

Callum Buntrock

Naomi Cheong

Natalie Crane

Elle Fishlock

Will Fitzpatrick

Jev Gore-Samad

Beth Hall

Molly Houlden

Amelia Howell

Isobell Jones

Olly Kam

Lauren Lemon

Issac Ling

Adam Mackintosh

Ben Moyes

Trinity Pascavage

Tom Scott

Tom Silkstone

Dan Smith

Grace Wharton-Richardson

Zhen Yu Zhou

William Aitken

William Ashwood

Thomas Batchelor

Deaglan Bowman

Sophie Child

James Clark

Oliver Claxton-Webb

Georgina Dunkinson

Isaac Holliday

Chloe Mayes

Elise Squirrell

Hannah Skinner

Molly Mackay

Mollie Lauritsen

Allanah Shaw

Catriona Scott

Orla Young

Aimee Milne

Katie Munro

Chloe Mackay

Iain Carlton

Marion MacDonald

Beryl Baxter

William Bliault

Georgia Clarke

Liam Fidler

Shannon Flannagan

Blair Fraser

Lewis Grant

Aidan Henderson

Jack McLennan

Max Robertson

Benjamin Sonnet

Megan Thompson

Sophie Thompson

Kayleigh McClean

Alex Hamond

Sahra Johnson

David Lodge

Niamh Anderson

Scott Blelloch

Adam Cram

Jonathon Cunningham

Oliver Duffy

Ronan Evans

Alisha Flauger

Ellie Freel

Pippa Harzmeyer

Lewis Lennon

Devlin Livingstone

Keeran McAtee

Leonie McCutcheon

Taylor McEwan

Kelsey Millar

Hannah Montgomery

Cara Muir

Ross Muir

Faye Ronald

Niamh Stewart

Janice Strachan

Les Hendren

John Anderson

Rhona Henderson

Sara MacKenzie

Fraser Roach

Murdo Whitfield

Caitlin Campbell

Kieren Nicholson

Mia Ratter

Harry Siddall

Kaitlyn Urquhart

Ian Baldry  
Andy Heys  
Lydia Kitchen  
Celestine Leadbeater  
Lois Hulse  
Evie Carradice  
Faye Carradice  
Megan Bland  
Miya Bainbridge  
Georgia Metcalfe  
Sarah Walker  
Katie Young  
James Waggett  
Karol Kowalski  
Jack Liu  
Michael Stables  
Abi Wells  
Eilis McGowan  
Phoebe Carr  
Chloe Barnes  
Louise Caprani  
Megan Clelland  
Paulina Pawlowska  
Karen Cooper  
Katherine Sparrow  
Patrick Arana  
Athea Ashley  
Finn Clarke  
Kiera Douglas  
Ruth Elsegood  
Olivia Gardner

Molly Hemmings

Ythan Jones

Luke Mchugh

Matthew Mckeating

Charlotte O'Connor

Eli-Louise Pickes

Mark Ebdon

Megan Williams

Gwen Williams

Osian Williams

Mali Jones

Nia Pearson

Lucy Roberts

Einir Williams

Steffan Tudor

Sophie Coyne

Maddison Owen

Catalina David

Jaimee Greenwood

Ammal Shahid

Tracey Derbyshire

Sarah Wilson

Joseph Attwood

Pfimbi Dengu

Kaan Geundogdou

Morgan Harrison

Nicholas Hayes

Rowan Newark

Ben Self

Jake Allport

William Ansley

Laila Baur-Harrison

Ryan Bellman

Aiden Bennie

Isabelle Bruton

Toby Charlton Young

Stephen Irinoye

Jools Johnston-Elliott

Amara Lee

James Logie

Lewis Noden

Michael Leake

Philip Larter

Niamh Reilly

Rebecca McAuley

Eilidh Cullen

Nicola Gaimster

Jack Agnew

Roisin Kane

Lewis Todd

Luke Convery

Sophie Kane

Katie McClair

Olivia Bissell

Sophie Hanlon

Jordanne Carr

Mark Malloy

Laura Anne McLean

Aaron Curtis

Jack Campbell

Fallon Cuthll

Abbie Hughes

Liam Sneddon

Chloe Renwick

Karly Hegarty

Lewis McGowan

Michael Frew

Umar Hashmi

Megan Quigley

Shannon Malloy

Lisa McNeil

Zoe Tucker

Aimee Douglas

Ailsa Barr

Rachel Meek

Mae Eathorne

Steven Kyle

Ross Graham

Aaron Nobile

Cameron Shaw

Chloe Allan

Pamela McGregor

Mary Sowter

Josh Dowlman

Oliver Floren

Jamie Lowthian

Tom McFarlane

Jack Kellas

Spencer Lawrence

Hana Ymeri

Anthony Di Gaetano

Patrick Buchanan

Sophie Hatia

Ishrat Jahan Ahmed

Kejsi Leci

Ramisa Chowdhury

Leon Dailani

Hugo Pang

Alice Monaghan

Katy Watson

Heidi Omar

Gry Christensen

Halle Kennedy

Amy Roberts

Manpreet Thakur

Emily Fox

Lottie Fox

Kat Richards

Jessica Fuller

Tara Allinson

Alex Simmonds

Lucy Coull

Imogen Young

Victoria McRitchie

Sophie Arnold

Megan Pottast

Eloise Boyd

Vicky Erry

Charlie Bell

Lynn Nickerson

Hilary Griffiths

Louisa Taylor Wright

Toby Brockbank-Gash

Stuart Bryers



Daniel Cooke

Lewis Crabbe

David Crocker

Andi Goss

Jake Hayes

Abbie Mainard

Oliver Warwick

Richard Jones

Susan Smith

Kieran Agg

Isaac Brumfit

Joe Grimshaw

Nathan Hawkes

George Omar

Oli Plazas

Sebastian Small

Rachel Harris

Joseph Watts

Sam Mortimer

Thomas Oliver

Kaisha Smith

Amazon Gilpin

Scarlett Forest

Rebekah Durnall

Mark Selwood

Thomas Reichmann

Becky Shore

Angus Campbell

James Campbell

Alex Hardie

Katie Houston

Jamie Jordan

Annika Keppie

Kia MacDonald

Tom Lines

Sophie Carswell

Kirsteen MacKinnon

Lucy Stefek

John Porter

Christopher Villaquiran

Jonathan Tunncliffe

Alex Long

Alex de Beer

Henry Morgan

George Irving

Isabelle Browne

Emma Gibbs

Katherine Ormerod

Nicole Frederick

Shannon Coates

Sid Sule

Emily Hamer

Hannah Worthington

Tamsin Drury

Ethan Colman

Anna Gautrey

Mubashir Raza

Rachael Davidson

Amy Goymer

Hasan Murad

Junaid Ur-Rehman

Henilkumar Patel

Aadil Khan

Hannah Marrow

Shannon Raponi

Rebecca Delaney

Kira Unsworth

Jack Ambrose

Stephen Hancock

Michael Jacques

Natalie Goadby

Elliot Hicks

Rachel Chan

Jolene Taylor

Vicky Kilshaw

Jim Wareing

Lawrence Baker

Tobias Allen

Jessica Henry

Sanskriti Sahoo

Archie Awford

Josh Nixon

Harry Seymour

Harry Murphy

Will Wood

Will Denton

James Page

Michael Repton

Will Harris

Lauren Manton

Grady Beckett

Jacob Adams

Poppy Goodall

Caitlin Davies

Eleanor Hoch

Ella Feenstra

Oliver Barnby

Daniel Gibson

Myles Terry

Eirlys Walters

Rachel Allan

Daniel Morris

Jake Minihan

Alex Smith

Matthew Davies

Sophie Cooper

Robin Ashdown

Talal Mohammed Ahmed

Mariya Ajaz

Aisha Akofio-Sowah

Precious Ampontuah

Eleanor Butler

Xihang Chen

Sami Eltayeb

Bethany Green

Eve Harding

Lagin Haroun

Finbar Hatton

Savraj Hunjan

Ephraim Joseph

Bidhan Kandol

Bethany Kelliher

Fiona Kemm

Harry Khoo

Andy Millar

Isabelle Prichard

Aishwarya Shah

Ellen Tiffin

Mark Smith

Andrew Jones

Elise Botham

Krystyna Zajac

Will Jones

Lauren Pound

Lauren Green

Tina Chen

Deborah Nyaberi

Dan Hope

Oscar Payne

Arthur Georgeson

Nathan Woolley

James Castle

Rohan Choudhury

Sophie Upward

Ellie Davis

Anna Penny

Ed Hellowell

Dylan Sherman

Abigail Wood

Perrine Humphreys

Amelia Hoad

Madison Green

Lauren Pyzer

Jessica Watts

Jarrad Hunt

Temiola Olapade-Ayomidele

Masashi Okitan

Matthew Joseph Mulcahy

Flossie Rousseau

Aaron Middlemas

Alexander Crookes

Joseph Cannon

Mille Simnet

Richard Gooch

Curtis Maltby

Jenifer Bailey

Stacey Oswald

Freya Pease

Owen Sturrock

Fraser Cowell

Waqar Butt

Josh Hacker

James West

Joseph Marsh

Alisha Coowar

Kayleigh Thompson

Georgina Honeywill

Abbie Cobb

Arnya Amer

Mason Burke

Aimee Barlow

Amy Batey

Megan Boyle

Elizabeth Brown

Phoebe Burnley

Phoebe Cansfield

Phoebe Clarke

Lauren Coverdale

Adam Dovaston

Daniel Mann

Ellie McCormick

Charlotte Millward

Bradley Moresby White

Alex Natrass

Matthew Simpson

Madeline Tate

Sophie White

Sophie Wilkinson

Jack Stephenson

Harley Heynes-Sefton

Samantha Driver

Sarah Coxon

Karen Dent

Neil Fishburn

Raissa Das

Antonia Ellis

Harriet Foster

Rhiannon Haynes

Sam Hardaker

Eve Winders

Maria Van der Vegt

Aleezah Rahman

Arjan Barard

Sinead Forson

Edward Bourton

Georgina Fleming

Oliver Payton

Polly MacKenzie

Abinash Jasetharan

Olivia Boardman

Harry Durham

Keerthana Sriram

Pranav Kesavan

Adhithi Kedlaya

Praveen Fernando

Jonathan Longman

Jasbir Lota

Nell Miles

Mia Morrell

Oliwia Kaminska

Lucy Peel

Oliver Peel

Natalie Dobson

Hanna Jenkinson

Ruby Hind

Adeela Afzal

Salma Afzal

Bushra Mahmood

Jack Antonen

Ben Greenley

Alex Waplington

Libby Richardson

Josh Geary

Jess Norris

Aaron Benton

Ollie Wainwright

Isaac Wainwright

Louis Gibson



Max Brown

Sam Stokes

Savannah McGeachy

Amy Senior

Mat Wainwright

Lowri Best

Tom Forteath

Liam Fraser

Lindsay Garrick

Michael Gibson

Rhodri Hawkins

Eleanor Hutcheon

Anne Hutchison

Maria Irvine

Ian Leach

John-Ross Ratter

Harry Robertson

Fyntan Shaw

Jack Tait

Nathan Watt

Max Eustace

Phil Jones

Elliot Wood

Tom Cox

Emmanuel Lamidi

Himmat Malhi

Mustafah Umar

Benji Marshall

Angela Squier

Maria Buust

Aziz Abdul

Aaron Bunyon

Rebecca Coles

Molly Coxon

Yoana Sevova

Connor Cosgrove

Annabel MacGregor

Michael Cairns

Fiona Bruce

Helen Little

Daria Damian

Bejamin OCansey

Haneen Ahmad

Abi Rayen

Julie MacGregor

Bella Fenton

Julia Escarrabill

Piotr Meczykowski

Wei Shen Chin

Scott Milner

Luke Bayley

Freya May

Samantha Durham

Ellie Drake-Sexton

Charlie Blows

Devika Vijith

Delyth Hartley

Gabriela Hamarova

Francesca Crockford

Bart Hunter

Elaine Johnston

Michael Neville

Gillian Yates

Lizzie Boulter

Dan Cochrane

Marida Iannic-Ravn

Tom Jewson

Isabel Manuel

Emma Pratt

Will Marachov

Alicia Wilson

Isobel Hamilton

Lucie Horne

Kieron Povey

Harry Brown

Shaun van Putten

Ronan Hill

Morgan Stewart

Beth Wilson

Ewen Kirk

Lucy King

Cat Fouracres

Emma Stenhouse

Christopher Yip

Arran Davie

Katie Paxton

Matt King

Lucy Flint

Mirza Baig

Jenny Clarke

Jenni Bowden

Elio Baldassarra

Phoebe Barr

Matthew Cassidy

Haydn Drummond

Morgan Dunlop

Brodie Gillies

Kaitlyn Gillingham

Elise Gillon

Cody Hughes

Brooke Kiltie

Ciara McAnespie

Liam McCloskey

Davis McIlvanney

Cailey McIntyre

Evie Meiklem

James Muir

Kyle Mullen

Emily Robinson

Fraser Stewart

Mohammed Absar

Eagan Carson-Walker

Samuel Jeffery

Benjamin Knott

Finnian McLean

Michael Midwinter

Muhammed Musa

Malcolm Neil

Tom Nicholls

Eugene Otoibhi

Sean Otto

Joshua Rastelli-Lewis

Alexander Royce

Anthony Tai

Timothy Ye

Mike Ryan

Precious Abbey

Amie Dredge

Sabaa Hussain

Emily Putney

Sam Hall

Jack Hills

Lucy Webster

Hannah Read

Katherine Miller

Lokesh Bhupathiraju

Stephen Oyadiran

Emma Sweetman

Alen Abraham

Coco Zhang

Ashna Anil

Aishwaria Benny

Elodie Oweis

Sandra Jameel

Sarzana Khan

Matthew Norval

Alex Robinson

Riley Jensen

Ieaun Reed

Hannah Beaumont

Chloe Buller

Maisie Burrows

Elliot Collishaw-Darby

Jack Fisher

Larry Faircloth

Natalia Gray

Alicia Harwood

Josh Herring

Cameron Marrable

Ryan Mason

Rubya Miah

Hannah Rainbird

Kieran Taylor

Shauna Wright

Catherine Imlah

Christine Crozier

Richard Tear

Dan Townley

Simon Arthur

John Wheeler

Gail Lydford

Tom Gravestock

Kristina Hustwitt

Mark Walsh

Mike Gibbons

Ann Jeffery

Susan Taylor

Mhairi Barnett

Louise Simpson

Sonja Stocks

S. Lal

Julie McCarthy

Peter Smithson

Ed Roberts Rayne

Rebeca Balasingham

Lindsay Dale

Alison Hagyard

Sarah Longshaw

Kerry Lewis

Jane Hartley

Irene Somerville

Catherine Hetherington

Rosie Coates

Janet Sheldon

Francis Lemon

S Macfarlane

Daveid Lodge

Les Hendren

Allan Doyle

Ruth Lowe

John McHale

Alexandra Bushell

John Friel

Pam McGregor

Jonny Instone

Simon Flynn

Soozy Smith

Stuart MacDugall

Kevin Proctor

J Wylie

Emma Tunley

Rob Hussey

Sarah Grant

Amy Wilkinson

Fumbi Mhlanga

Marion Yeaman

Pat Nicol

David Francis

Sara Lambard

Gillian Coulson

D Brown

Laurie Ison

Katy Scott

Max Parsonage

David Hannah

Mike Beer

Rachael Gathercole

### **Project M Schools**

Albyn School, 17-23 Queens Road, Aberdeen, AB15 4PB

Campbell College, Belmont Road, Belfast, BT4 2ND

Dixie Grammar School, Station Road, Market Bosworth, CV13 0LE

Exeter School, Victoria Park Road, Exeter, EX2 4NS

Cheltenham College, Bath Road, Cheltenham, GL53 7LD

Ipswich School, 25 Henley Road, Ipswich, IP1 3SG

Gresham's School, Cromer Road, Holt, NR25 6EA

St Helen & St Katharine, Faringdon Road, Abingdon, OX14 1BE

St Paul's Catholic College, Jane Murray Way, Burgess Hill, RH15 8GA

St Margaret's School, Merry Hill Lane, Bushey, WD23 1DT

Newcastle High School for Girls, Tankerville Terrace, Jesmond, Newcastle upon Tyne, NE2 3BA

Lancing College, Lancing College, Lancing, Lancing, BN15 0RW

Badminton School, Westbury Road, Bristol, BS9 3BA

Oldham Hulme Grammar School, Chamber Road, Oldham, OL8 4BX

The Lady Eleanor Holles School, Hanworth Road, Hampton, TW12 3HF

Westhill Academy, Hay's Way, Westhill, Aberdeen, AB32 6XZ

Speyside High School, Mary Avenue, Aberlour, AB38 9QU

Mintlaw Academy, Station Road, Mintlaw, AB42 5FN



Sandringham School, The Ridgeway, St Albans, AL4 9NX

RSA Arrow Vale, Green Sward Lane, Redditch, B98 0EN

Steyping Grammar School, Shooting Field, Steyping, BN44 3RX

Keswick School, Vicarage hill, Keswick, CA12 5QB

Parkside Community College, Parkside, Cambridge, CB1 1EH

St Teilos, Circle Way East, Cardiff, CF23 9PD

Epping St Johns, Bury Lane, Epping, Essex, CM16 5JB

Ashlawn School, Ashlawn School, Ashlawn Road, Rugby, CV22 5ET

Eaton Bank, Jackson Rd, Congleton, CW12 1NT

Thomas Hardy School, Queens Avenue, Dorchester, Dorset, DT1 2ET

City & Islington College, 283-309 Goswell Rd, London, EC1V 7LA

Peebles High School, Springwood Road, Peebles, EH45 9HB

Currie Community High School, Dolphin Avenue, Currie, Edinburgh, EH14 5RD

Petroc, Old Sticklepath Hill, Barnstaple, EX31 2BQ

St. Mary's Catholic Academy, St. Walburga's Rd, Blackpool, FY3 7EQ

Stroud High School, Beards Lane, Cainscross Road, Stroud, GL5 4hf

John Hampden Grammar School, Marlow Hill, High Wycombe, HP11 1SZ

Stowupland High School, Church Road, Stowupland, Stowmarket, IP14 4BQ

Diss High School, Walcot Road, Diss, IP22 4DH

Tain Royal Academy, Scotsburn Road, Tain, IV19 1PS

Elgin Academy, Morriston Road, Elgin, IV30 4ND

Auchenharvie Academy, Saltcoats Rd, Stevenston, Irvine, KA20 3JW

Stewarton Academy, Cairnduff Place, Stewarton, KA3 5QF

Golspie High School, Main Street, Golspie, KW10 6RF

Viewforth High School, Windmill Community Campus, Windmill Road, Kirkcaldy, KY1 3AL

Our Lady's Catholic College, Lancaster, Morecambe Road, Lancaster, LA1 2RX

Morecambe Community High School, Dallam Avenue, Morecambe, LA4 5BG

De Lisle College, Thorpe Hill, Loughborough,, Leicestershire,, LE11 4SQ

Ysgol Glan Clwyd, Ffordd Uchaf Dinbych, Llanellwy, LL17 ORP

Roundhay School, Old Park Road, Leeds, LS8 1ND

Flixton Girls' School, Flixton Road, Manchester, M41 5DR

Queen Elizabeth's Grammar School, Abbey Place, Faversham, ME13 7BQ

St Andrews High School, 9 Old Monkland Road, Coatbridge, ML5 5EA

Larkhall Academy, Broomhill Road, Larkhall, South Lanarkshire, ML9 1QN

Marden Bridge Middle School, Lovaine Avenue, Whitley Bay, NE25 8RW

Toot Hill School, The Banks, Bingham, Nottinghamshire, NG13 8BL

The Camden School for Girls, Sandall Road, London, NW5 2DB

Didcot Girls' School, Manor Crescent, Didcot, OX11 0HD

UTC Oxfordshire, Greenwood Way, Harwell, Didcot, OX11 6BZ

St Birinus School, Mereland Road, Didcot, OX11 8AZ

Abingdon and Witney College, Wooton Road Abingdon, Abingdon, OX14 1GG

Notre Dame High School, Dunlop Street, Greenock, PA16 9BJ

Oban High School, Soroba Road, Oban, PA34 4JB

Devonport High School for Boys, Paradise Road, Plymouth, PL1 5QP

Runshaw College, Langdale Road, Leyland, PR25 3DQ

St Bartholomew's School, Andover Road, Newbury, RG14 6JP

The Downs School, Compton, Newbury, RG20 6AD

Maiden Erlegh School, Silverdale Road, Reading, RG6 7HS

The College of Richard Collyer, Hurst Road, Horsham, RH12 2EJ

Tapton School (IRIS Northern Hub), Darwin Lane, Sheffield, S10 5RG

The Ridgeway School, Inverary Road, Wroughton, Swindon, SN4 9DJ

Sedgefield Community College, Hawthorn Road, Sedgefield, Durham, TS21 3DD

Turing House School, Queen's road, Teddington, TW11 0LR

Ealing, Hammersmith and West London College, The Green, Ealing, London, W5 5EW

Parmiter's School, High Elms Lane, Watford, WD25 0UU

Kettlethorpe High School, Standbridge Lane, Sandal, Wakefield, WF2 7EL

Anderson High School, Lovers Loan, Lerwick, Shetland, ZE1 0JH

King Edward VI Five Ways, Scotland Lane, Birmingham, B32 4BT

St. Joseph's College, Craig's Road, Dumfries, Dumfries, DG1 4UU

Stirling High school, Torbrex Farm Road, Stirling, FK8 2PA

Chichester College, Westgate Fields, Chichester, PO19 1SB

Peter Symonds College, Owens Road, Winchester, SO22 6RX

Jedburgh Grammar School, High Street, Jedburgh, TD8 6DQ

Cranbrook School, Cranbrook School, Waterloo Road, Cranbrook, TN17 3JD

Friary School, Eastern Avenue, Lichfield, WS13 7EW

The Chase, The Chase School, Geraldine Road, Malvern, WR14 3NZ

Portobello High School, 1 Milton Road, Edinburgh, EH15 3BY

d'Overbroeck's, 111 Banbury Road, Oxford, OX2 6JX

St Joseph's Academy, Grasswards Road, Kilmarnock, KA3 7SL

Lancaster RGS, East Road, East Road, Lancaster, LA1 3EF

Waingels College, Waingels Road, Woodley, Reading, RG5 4RF

St David's Catholic Sixth Form College, Ty Gwyn Road, Penylan, Cardiff, CF23 5QD

Sprowston Community High School, Cannerby Lane, Norwich, NR7 8NE
