# Supplementary material for: Project M: investigating the effect of additives on calcium carbonate crystallisation through a school citizen science program
Source: Royal Society of Chemistry journal article supplement (doi:10.1039/d3ce01173a), 2024-01-01
Supplement: d3ce01173a4.pdf [file d3ce01173a4.pdf]

*Project M: Investigating the effect of additives on calcium carbonate crystallisation through a school citizen science program.*

Supplementary Information

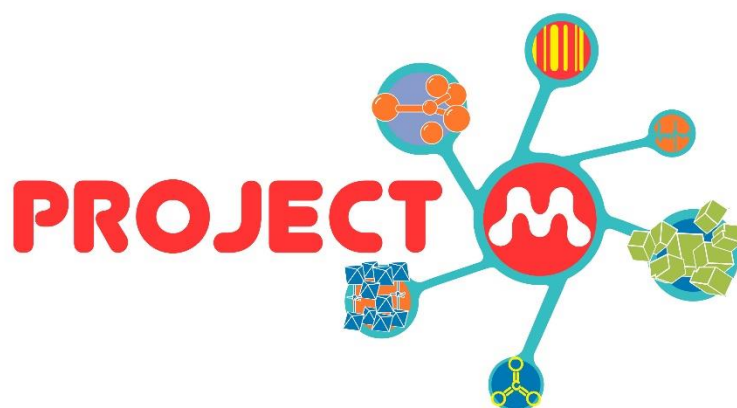

## Contents

|                                                                         |    |
|-------------------------------------------------------------------------|----|
| Table of Figures.....                                                   | 3  |
| Methods.....                                                            | 4  |
| Materials .....                                                         | 4  |
| Synthetic Procedure.....                                                | 4  |
| Synchrotron X-ray Powder Diffraction Data Collection and Analysis ..... | 5  |
| Structural Information .....                                            | 7  |
| Reference Cells for Vaterite Refinements.....                           | 8  |
| Calcite refined mean lattice parameters and standard deviations .....   | 9  |
| Vaterite refined mean lattice parameters and standard deviations .....  | 10 |
| Calcite $a$ for Additive Groupings .....                                | 11 |
| Vaterite $c$ for Additive Groupings .....                               | 12 |
| Vaterite $a$ for Additive Groupings.....                                | 13 |
| References .....                                                        | 14 |

## Table of Figures

|                                                                                                                                                                                                                                                                                |    |
|--------------------------------------------------------------------------------------------------------------------------------------------------------------------------------------------------------------------------------------------------------------------------------|----|
| Figure 1 - Robot (blue object to left of image) mounting the sample on the diffractometer (left) and capillary of 66-01 in position on the diffractometer (right).....                                                                                                         | 6  |
| Figure 2 - The mean lattice parameter of calcite $a$ with the corresponding standard deviations, presented on the same relative scale and categorised according to the additive groupings (presented in increasing size). .....                                                | 11 |
| Figure 3 - The mean lattice parameter of vaterite $c$ with the corresponding standard deviations, presented on the same relative scale and categorised according to the additive groupings (presented in increasing size). .....                                               | 12 |
| Figure 4 - The mean lattice parameter of vaterite $a$ with the corresponding standard deviations and categorised according to the additive groupings (presented in increasing size). Note that here this graph has a smaller y-axis range than Figure 10(b) in the paper. .... | 13 |

## Methods

### Materials

The following chemicals were purchased or donated by Sigma Aldrich and used as received;  $\text{CaCl}_2 \cdot 2\text{H}_2\text{O}$  and  $\text{Na}_2\text{CO}_3$  (both ACS reagents, 99.5%), Adipic Acid (99%), L-Alanine ( $\geq 98\%$ ), L-Arginine ( $\geq 98\%$ ), L-Asparagine ( $\geq 98\%$ ), L-Aspartic Acid ( $\geq 98\%$ ), L-Cysteine (97%), L-Glutamine ( $\geq 99\%$ ), L-Glutamic Acid ( $\geq 99\%$ ), Glutaric Acid (99%), Glycine ( $\geq 99\%$ ), L-Histidine ( $\geq 99\%$ ), L-Isoleucine ( $\geq 98\%$ ), L-Leucine ( $\geq 98\%$ ), L-Lysine ( $\geq 98\%$ ), Malonic Acid (99%), L-Methionine ( $\geq 98\%$ ), L-Phenylalanine ( $\geq 98\%$ ), Pimelic Acid (99%), L-Proline ( $\geq 99\%$ ), L-Serine ( $\geq 99\%$ ), Succinic Acid ( $\geq 99\%$ ), L-Threonine ( $\geq 98\%$ ), L-Tryptophan ( $\geq 98\%$ ), L-Valine ( $\geq 98\%$ ).

### Synthetic Procedure

Standard solutions of 0.1 M  $\text{CaCl}_2 \cdot 2\text{H}_2\text{O}$  (A) and 0.1 M  $\text{Na}_2\text{CO}_3$  (B) were prepared using deionised water. The Control samples were made by mixing 100 mL of A and 100 mL B for two minutes in a conical flask, filtering with standardised filter paper and funnels, washing with water and subsequently quenching the reaction with isopropanol or acetone. This process was repeated eight more times with the addition of a different concentration of the additive (see Table 1) to 100 mL of A before mixing A with B. The concentrations of the additives were selected based on the maximum solubilities of the individual additives as well as the routine equipment available at the majority of schools based on conversations with multiple teachers and lab technicians e.g., balances up to 2 decimal places are the norm in school laboratories and the units conventionally used are  $\text{dm}^{-3}$ . The synthetic procedures were provided to the schools both via written procedure and video. Each school made one series with a given additive and each series was made 4 times in different schools to ensure consistency. The resulting precipitates were left to dry on the filter paper in a dry place for one week before the powdered sample was loaded into a 0.5 mm Kapton capillary. The samples were returned to Diamond and mounted in a brass pin and brass holder for the diffraction experiment. Samples were checked to ensure they were correctly filled and re-filled where necessary. Each brass holder had a barcode inset into the base that was scanned before each data collection so the sample and the scan can be correlated.

Table 1 - List of amino acids used in syntheses

| <b>Additive Concentrations of 0.25, 0.5, 0.75, 1, 1.25, 1.5, 1.75 and 2</b>   |        |     |
|-------------------------------------------------------------------------------|--------|-----|
| Ala                                                                           | Arg    | Asn |
| Cys                                                                           | GluAci | Gly |
| His                                                                           | Ile    | Lys |
| MalAci                                                                        | Met    | Pro |
| Ser                                                                           | SucAci | Thr |
| Val                                                                           |        |     |
| <b>Additive Concentrations of 0.1, 0.25, 0.5, 0.75, 1, 1.25, 1.5 and 1.75</b> |        |     |
| Leu                                                                           | Phe    |     |
| <b>Additive Concentrations of 0.1, 0.2, 0.25, 0.3, 0.35, 0.4, 0.45, 0.5</b>   |        |     |
| Asp                                                                           | Glu    | Try |
| <b>Additive Concentrations of 0.2, 0.25, 0.5, 0.75, 1, 1.25, 1.5, 1.7</b>     |        |     |
| Gln                                                                           |        |     |
| <b>Additive Concentrations of 0.2, 0.3, 0.4, 0.5, 0.6, 0.7, 0.8, 1</b>        |        |     |
| AdiAci                                                                        | PimAci |     |
| <b>Mixing Times (seconds)</b>                                                 |        |     |
| 30, 60, 180, 240, 300, 360, , 480, 600                                        |        |     |

## Synchrotron X-ray Powder Diffraction Data Collection and Analysis

Significant software and hardware updates were implemented on I11 to upgrade the robot and carousel, to enable the scanning of the barcodes for each sample, to install cameras for sample photographs, to facilitate live tweeting of the data via @DLSProjectMLive and to create a new database to handle the data. One diffraction pattern was collected for each sample at Beamline I11 at Diamond Light Source in a 24-hour period using the Mythen II position sensitive detector.<sup>1, 2</sup> All data were collected at room temperature with a wavelength of 0.825786(10) Å, using the robotic arm to mount each sample (Figure 1). The Project M Scientists were provided with a modified version of the DAWN software through a web interface for phase identification of their materials and for comparison with standards and other related samples from other schools. Data were analysed using Pawley refinement via the TOPAS 4.2 software package<sup>3</sup> using jEdit in batch mode. An initial script was used to identify the presence of calcite or vaterite based of the intensity of the calcite 104 or the vaterite 010 reflections. Only phases indicated as present were included in the refinement. The quality of the fits was assessed and only those with clear visible peaks matching the relevant polymorph were included in further analysis.

The full dataset and associated file information are available on Zenodo.

Figure 1 - Robot (blue object to left of image) mounting the sample on the diffractometer (left) and capillary of 66-01 in position on the diffractometer (right)

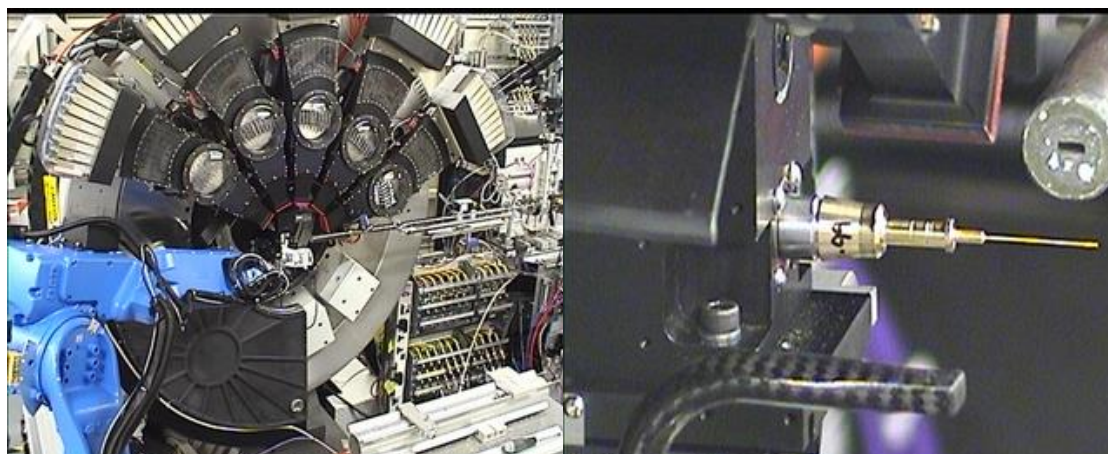

## Structural Information

Table 2 - Standard deviations for calcite and vaterite for the Control samples, for the samples synthesised with additives ('All Additives'), for the Mixing samples, and for Synthetic and Biogenic literature samples of Calcite. N is the number of samples in which the respective polymorph is present.

| Polymorph                                   | $a$ Mean | $\sigma_a$ | $c$ Mean | $\sigma_c$ | Volume Mean | $\sigma_{Volume}$ |
|---------------------------------------------|----------|------------|----------|------------|-------------|-------------------|
| Calcite Control (N=84)                      | 4.99705  | 0.00186    | 17.06045 | 0.00435    | 368.9343    | 0.20184           |
| Calcite All Additives (N=573)               | 4.99604  | 0.00193    | 17.07227 | 0.01142    | 369.04069   | 0.24107           |
| Calcite Mixing Only (N=16)                  | 4.99853  | 0.00176    | 17.05836 | 0.00294    | 369.10644   | 0.2111            |
| Synthetic Calcite (N=13) <sup>4-11</sup>    | 4.98986  | 0.00204    | 17.06398 | 0.00874    | 367.9493    | 0.41268           |
| Biogenic Calcite (N=32) <sup>4, 11-15</sup> | 4.98168  | 0.01279    | 17.03572 | 0.0553     | 366.1441    | 3.0167            |
| Vaterite Control (N= 37)                    | 4.12802  | 9.05675E-4 | 8.47364  | 0.0019     | 125.05001   | 0.03634           |
| Vaterite All Additives (N=412)              | 4.12814  | 0.00108    | 8.47411  | 0.00228    | 125.06424   | 0.04365           |
| Vaterite Mixing Only (N=8)                  | 4.12813  | 3.61E-4    | 8.47478  | 0.0012     | 125.07392   | 0.01756           |

## Reference Cells for Vaterite Refinements

Each of the published unit cells for vaterite was used in a refinement with calcite for the set of Controls samples. Both unit cells were allowed to freely refine. The mean and standard deviations for the associated lattice parameters for the 84 calcite control samples and the 37 vaterite control samples are presented in Table 1 and 2 respectively. The Kamhi vaterite cell<sup>16</sup> had the lowest standard deviation for both polymorphs and had the better fit across both polymorphs, and was therefore used in this work.

Table 3 - Calcite (top) and Vaterite (bottom) units cells from refinements with the Controls samples

| Calcite                        |          |            |          |            |             |                   |
|--------------------------------|----------|------------|----------|------------|-------------|-------------------|
| Vaterite Unit Cell Used        | $a$ Mean | $\sigma_a$ | $c$ Mean | $\sigma_c$ | Volume Mean | $\sigma_{Volume}$ |
| Demichelis C1_1 <sup>17</sup>  | 4.99712  | 0.00335    | 17.05667 | 0.02115    | 368.8621    | 0.60168           |
| Demichelis C121 <sup>17</sup>  | 4.99696  | 0.00291    | 17.05797 | 0.01354    | 368.8665    | 0.52991           |
| Demichelis P3231 <sup>17</sup> | 4.99818  | 0.00919    | 17.04344 | 0.10397    | 368.7256    | 1.09263           |
| Wang P3231 <sup>18</sup>       | 4.99741  | 0.00507    | 17.06042 | 0.00857    | 368.9869    | 0.68683           |
| Kamhi <sup>16</sup>            | 4.99701  | 0.00186    | 17.06068 | 0.00441    | 368.9334    | 0.20376           |

| Vaterite                       |          |            |          |            |          |            |           |               |           |               |           |               |             |                   |
|--------------------------------|----------|------------|----------|------------|----------|------------|-----------|---------------|-----------|---------------|-----------|---------------|-------------|-------------------|
| Vaterite Unit Cell             | $a$ Mean | $\sigma_a$ | $b$ Mean | $\sigma_b$ | $c$ Mean | $\sigma_c$ | $AI$ Mean | $\sigma_{AI}$ | $Be$ Mean | $\sigma_{Be}$ | $Ga$ Mean | $\sigma_{Ga}$ | Volume Mean | $\sigma_{Volume}$ |
| Demichelis C1_1 <sup>17</sup>  | 12.74956 | 0.21857    | 7.13808  | 0.04587    | 25.66026 | 0.14105    | 89.69247  | 0.55628       | 99.60814  | 1.07794       | 90.73727  | 0.58051       | 2301.413    | 27.62445          |
| Demichelis C121 <sup>17</sup>  | 12.39038 | 0.01675    | 6.9528   | 0.03174    | 9.44425  | 0.03473    | --        | --            | 115.1022  | 0.06779       | --        | --            | 736.7459    | 0.90549           |
| Demichelis P3231 <sup>17</sup> | 7.664    | 0.01314    | --       | --         | 26.0543  | 0.02316    | --        | --            | --        | --            | --        | --            | 1325.325    | 4.16663           |
| Wang P3231 <sup>18</sup>       | 7.14305  | 0.05582    | --       | --         | 25.48654 | 0.19765    | --        | --            | --        | --            | --        | --            | 1126.199    | 16.31555          |
| Kamhi <sup>16</sup>            | 4.12802  | 9.05675E-4 | --       | --         | 8.47364  | 0.0019     | --        | --            | --        | --            | --        | --            | 125.05001   | 0.03634           |



## Calcite refined mean lattice parameters and standard deviations

Table 4 - Calcite refined mean lattice parameters and standard deviations for the additives presented in this work

| Calcite              |         |         |            |          |            |           |                   |
|----------------------|---------|---------|------------|----------|------------|-----------|-------------------|
| Additive             | N total | Mean    | $\sigma_a$ | Mean     | $\sigma_c$ | Mean      | $\sigma_{Volume}$ |
| Controls             | 84      | 4.99705 | 0.00186    | 17.06045 | 0.00435    | 368.9343  | 0.20184           |
| AdiAc                | 15      | 4.99322 | 8.48E-4    | 17.07069 | 0.00521    | 368.59036 | 0.09299           |
| Ala                  | 27      | 4.99584 | 0.00162    | 17.06989 | 0.00731    | 368.9587  | 0.21637           |
| Arg                  | 23      | 4.99862 | 0.00189    | 17.05815 | 0.00386    | 369.11639 | 0.21048           |
| Asn                  | 27      | 4.99485 | 0.0013     | 17.0818  | 0.00509    | 369.07034 | 0.16759           |
| Asp                  | 30      | 4.99407 | 0.00204    | 17.08525 | 0.00999    | 369.02928 | 0.26124           |
| Cys                  | 26      | 4.99547 | 0.00104    | 17.08063 | 0.00913    | 369.13691 | 0.12424           |
| Gln                  | 22      | 4.99651 | 5.71E-4    | 17.07627 | 0.0085     | 369.19653 | 0.14765           |
| Glu                  | 38      | 4.99458 | 0.00153    | 17.08509 | 0.0163     | 369.10079 | 0.23734           |
| Gly                  | 29      | 4.99605 | 0.00104    | 17.08192 | 0.01148    | 369.2499  | 0.27933           |
| His                  | 34      | 4.99579 | 0.001      | 17.07625 | 0.00713    | 369.08959 | 0.20019           |
| Ile                  | 23      | 4.99688 | 6.31E-4    | 17.0639  | 0.00194    | 368.98334 | 0.09935           |
| Leu                  | 28      | 4.9966  | 7.29E-4    | 17.0659  | 0.0052     | 368.98479 | 0.09538           |
| Lys                  | 31      | 4.9986  | 7.57E-4    | 17.05989 | 0.00214    | 369.14998 | 0.08843           |
| MalAci               | 8       | 4.9931  | 0.00285    | 17.07218 | 0.00738    | 368.6043  | 0.38494           |
| Met                  | 16      | 4.99662 | 4.52E-4    | 17.07319 | 0.00794    | 369.14615 | 0.14165           |
| Mixing               | 16      | 4.99853 | 0.00176    | 17.05836 | 0.00294    | 369.10644 | 0.2111            |
| Phe                  | 18      | 4.99568 | 9.46E-4    | 17.06715 | 0.00291    | 368.87668 | 0.15516           |
| PimAci               | 14      | 4.99355 | 0.00125    | 17.06917 | 0.00331    | 368.60483 | 0.21887           |
| Pro                  | 26      | 4.99755 | 0.00112    | 17.06475 | 0.0032     | 369.10128 | 0.15911           |
| Ser                  | 26      | 4.99598 | 0.00267    | 17.07246 | 0.01009    | 369.03492 | 0.27523           |
| SucAci               | 10      | 4.9955  | 0.00216    | 17.06813 | 0.00771    | 368.87097 | 0.28413           |
| Thr                  | 30      | 4.99565 | 0.00101    | 17.07927 | 0.00509    | 369.13388 | 0.16318           |
| Trp                  | 24      | 4.99691 | 0.00101    | 17.06915 | 0.01069    | 369.10071 | 0.21153           |
| Val                  | 32      | 4.99637 | 0.00107    | 17.06452 | 0.0028     | 368.92081 | 0.15107           |
| All Additive Samples | 573     | 4.99604 | 0.00193    | 17.07227 | 0.01142    | 369.04069 | 0.24107           |

## Vaterite refined mean lattice parameters and standard deviations

Table 5 - Vaterite refined mean lattice parameters and standard deviations for the additives presented in this work

| Vaterite             |         |         |            |         |            |           |                   |
|----------------------|---------|---------|------------|---------|------------|-----------|-------------------|
| Additive             | N total | Mean    | $\sigma_a$ | Mean    | $\sigma_c$ | Mean      | $\sigma_{Volume}$ |
| Controls             | 37      | 4.12802 | 9.05675E-4 | 8.47364 | 0.0019     | 125.05001 | 0.03634           |
| AdiAc                | 10      | 4.12773 | 5.88E-4    | 8.47364 | 0.00183    | 125.03256 | 0.02133           |
| Ala                  | 23      | 4.12859 | 9.58E-4    | 8.47267 | 0.00224    | 125.07015 | 0.0357            |
| Arg                  | 12      | 4.12712 | 0.00138    | 8.47536 | 0.00308    | 125.02069 | 0.04983           |
| Asn                  | 22      | 4.12756 | 9.35E-4    | 8.47518 | 0.00143    | 125.04503 | 0.04032           |
| Asp                  | 23      | 4.12682 | 0.00126    | 8.4779  | 0.00178    | 125.04049 | 0.06051           |
| Cys                  | 17      | 4.12833 | 8.51E-4    | 8.47376 | 0.00104    | 125.07067 | 0.04344           |
| Gln                  | 17      | 4.12774 | 5.17E-4    | 8.47469 | 9.04E-4    | 125.04888 | 0.02607           |
| Glu                  | 36      | 4.12768 | 0.00134    | 8.47502 | 0.00313    | 125.04991 | 0.04325           |
| Gly                  | 27      | 4.12902 | 0.00117    | 8.47369 | 0.00164    | 125.11133 | 0.05636           |
| His                  | 24      | 4.12854 | 8.11E-4    | 8.47297 | 0.00175    | 125.07149 | 0.02886           |
| Ile                  | 14      | 4.12831 | 4.01E-4    | 8.47364 | 0.00169    | 125.0677  | 0.01699           |
| Leu                  | 14      | 4.12863 | 5.55E-4    | 8.47281 | 0.00128    | 125.07508 | 0.02421           |
| Lys                  | 12      | 4.12761 | 5.46E-4    | 8.47412 | 0.00149    | 125.03244 | 0.0181            |
| MalAci               | 6       | 4.12611 | 0.00119    | 8.47756 | 0.00315    | 124.99228 | 0.06198           |
| Met                  | 9       | 4.12769 | 5.08E-4    | 8.47444 | 0.00114    | 125.04196 | 0.02483           |
| Mixing               | 8       | 4.12813 | 3.61E-4    | 8.47478 | 0.0012     | 125.07392 | 0.01756           |
| Phe                  | 15      | 4.12824 | 9.15E-4    | 8.47284 | 0.00167    | 125.05175 | 0.03505           |
| PimAci               | 5       | 4.12835 | 8.44E-4    | 8.47375 | 0.00113    | 125.0718  | 0.03776           |
| Pro                  | 24      | 4.1283  | 4.79E-4    | 8.474   | 0.00129    | 125.0721  | 0.02596           |
| Ser                  | 25      | 4.12907 | 7.93E-4    | 8.47293 | 0.00189    | 125.10357 | 0.03629           |
| SucAci               | 4       | 4.12786 | 0.00129    | 8.47645 | 0.00587    | 125.08221 | 0.02426           |
| Thr                  | 26      | 4.12845 | 7.78E-4    | 8.47377 | 0.00106    | 125.07807 | 0.03665           |
| Trp                  | 23      | 4.12841 | 5.12E-4    | 8.47357 | 0.00149    | 125.07275 | 0.02654           |
| Val                  | 16      | 4.1285  | 5.69E-4    | 8.47256 | 0.00166    | 125.06319 | 0.02562           |
| All Additive Samples | 412     | 4.12814 | 0.00108    | 8.47411 | 0.00228    | 125.06424 | 0.04365           |

## Calcite *a* for Additive Groupings

Figure 2 - The mean lattice parameter of calcite *a* with the corresponding standard deviations, presented on the same relative scale and categorised according to the additive groupings (presented in increasing size).

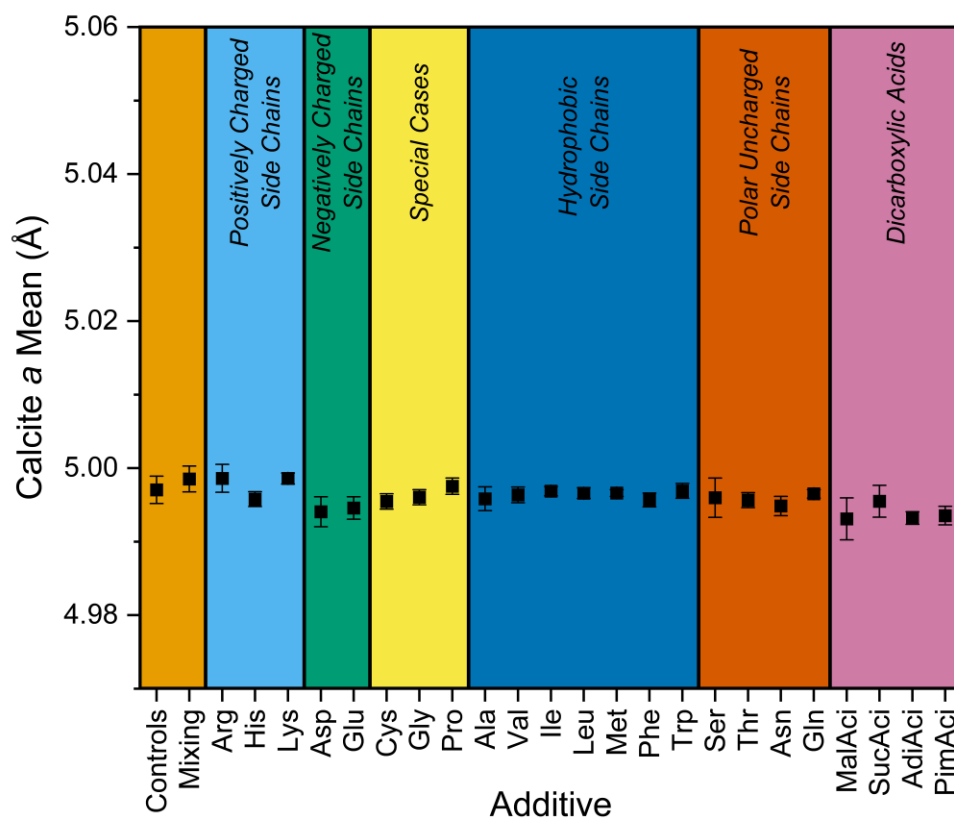

## Vaterite c for Additive Groupings

Figure 3 - The mean lattice parameter of vaterite c with the corresponding standard deviations, presented on the same relative scale and categorised according to the additive groupings (presented in increasing size).

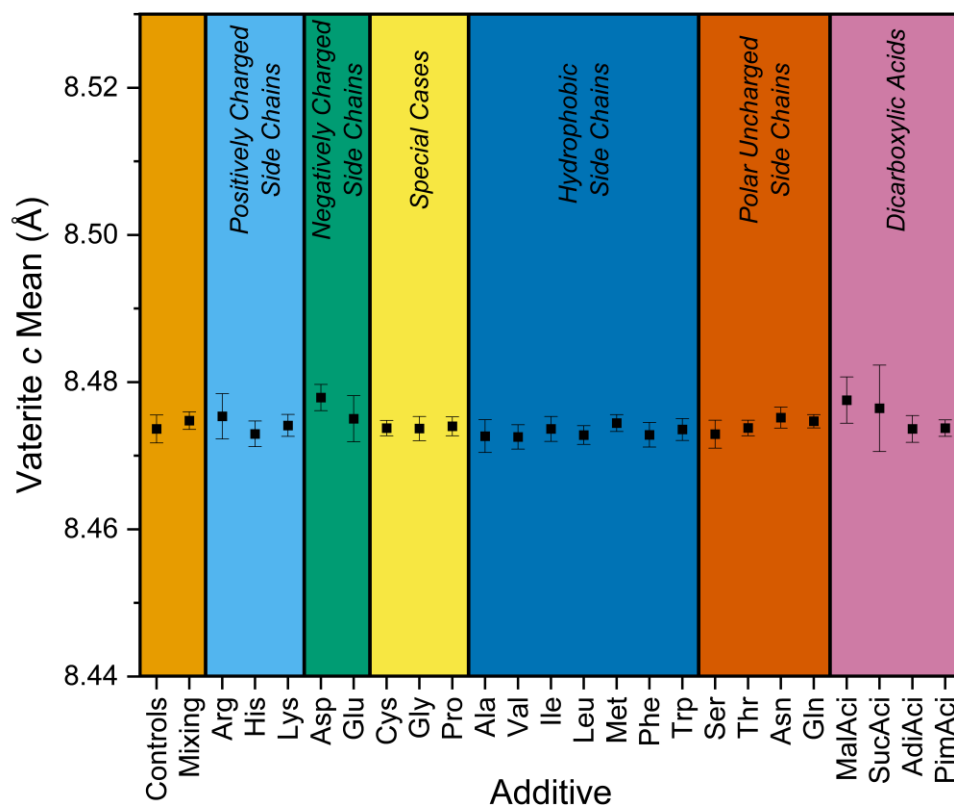

## Vaterite $a$ for Additive Groupings

Figure 4 - The mean lattice parameter of vaterite  $a$  with the corresponding standard deviations and categorised according to the additive groupings (presented in increasing size). Note that here this graph has a smaller y-axis range than Figure 10(b) in the paper.

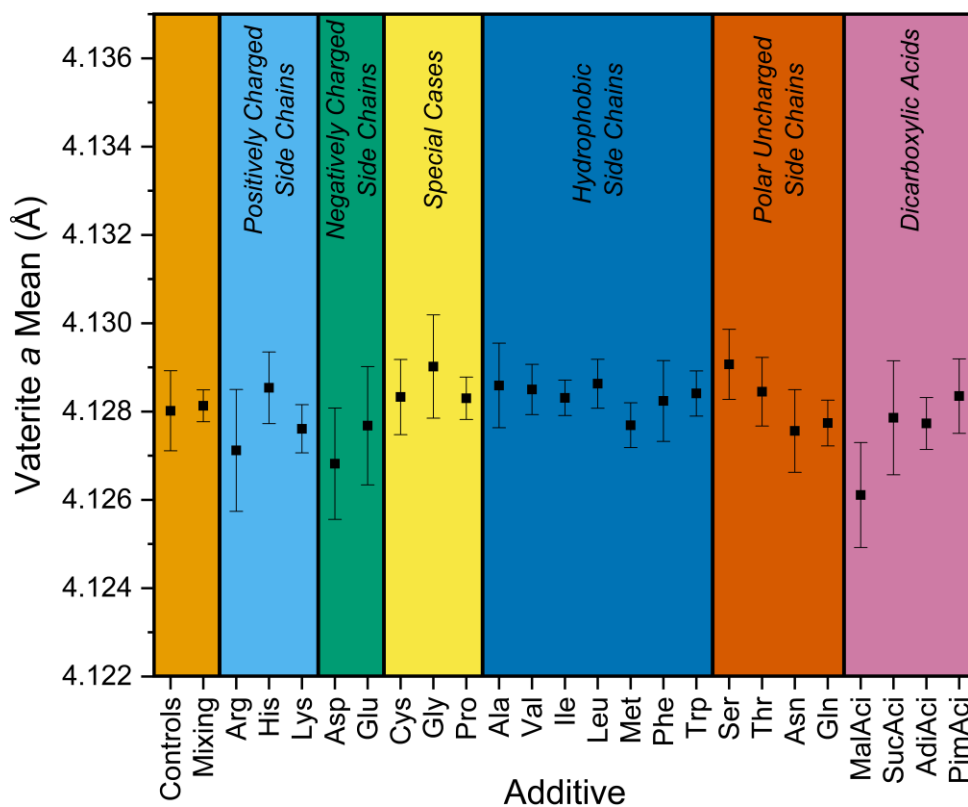

## References

1. S. P. Thompson, J. E. Parker, J. Marchal, J. Potter, A. Birt, F. Yuan, R. D. Fearn, A. R. Lennie, S. R. Street and C. C. Tang, *J. Synchrotron Rad.*, 2011, **18**, 637-648.
2. S. P. Thompson, J. E. Parker, J. Potter, T. P. Hill, A. Birt, T. M. Cobb, F. Yuan and C. C. Tang, *Rev. Sci. Instrum.*, 2009, **80**, 075107.
3. A. Coelho, *J. Appl. Crystallogr.*, 2018, **51**, 210-218.
4. S. M. Antao, I. Hassan, W. H. Mulder, P. L. Lee and B. H. Toby, *Phys. Chem. Miner.*, 2009, **36**, 159-169.
5. H. Chessin, W. C. Hamilton and B. Post, *Acta Cryst.*, 1965, **18**, 689-693.
6. D. L. Graf, *Am. Mineral.*, 1961, **46**, 1283-1316.
7. A. Ievič and M. Straumanis, *Z. Phys.*, 1940, **116**, 194-206.
8. M. Merlini, W. A. Crichton, J. Chantel, J. Guignard and S. Poli, *Mineral. Mag.*, 2018, **78**, 225-233.
9. W. W. Schmahl and E. Salje, *Phys. Chem. Miner.*, 1989, **16**, 790-798.
10. H. E. Swanson and R. K. Fuyat, *National Bureau of Standards*, 1953, **Circular No. 539**, pp. 52-53.
11. E. Zolotoyabko, E. N. Caspi, J. S. Fieramosca, R. B. Von Dreele, F. Marin, G. Mor, L. Addadi, S. Weiner and Y. Politi, *Cryst. Growth Des.*, 2010, **10**, 1207-1214.
12. M. Albéric, E. N. Caspi, M. Bennet, W. Ajili, N. Nassif, T. Azaïs, A. Berner, P. Fratzl, E. Zolotoyabko, L. Bertinetti and Y. Politi, *Cryst. Growth Des.*, 2018, **18**, 2189-2201.
13. S. Frølich, H. O. Sørensen, S. S. Hakim, F. Marin, S. L. S. Stipp and H. Birkedal, *Cryst. Growth Des.*, 2015, **15**, 2761-2767.
14. M. A. Hood, H. Leemreize, A. Scheffel and D. Faivre, *J. Struct. Biol.*, 2016, **196**, 147-154.
15. B. Pokroy, A. N. Fitch, F. Marin, M. Kapon, N. Adir and E. Zolotoyabko, *J. Struct. Biol.*, 2006, **155**, 96-103.
16. S. Kamhi, *Acta Cryst.*, 1963, **16**, 770-772.
17. R. Demichelis, P. Raiteri, J. D. Gale and R. Dovesi, *Cryst. Growth Des.*, 2013, **13**, 2247-2251.
18. J. Wang, F. Zhang, J. Zhang, R. C. Ewing, U. Becker and Z. Cai, *J. Cryst. Growth*, 2014, **407**, 78-86.
